1 Training level reveals a dynamic dialogue between stress and  
2 memory systems in birds

3

4 Flore Lormant<sup>1\*</sup>, Vitor Hugo Bessa Ferreira<sup>1,2\*</sup>, Julie Lemarchand<sup>1</sup>, Fabien  
5 Cornilleau<sup>1</sup>, Paul Constantin<sup>1</sup>, Céline Parias<sup>1</sup>, Aline Bertin<sup>1</sup>, Léa Lansade<sup>1</sup>,  
6 Christine Leterrier<sup>1</sup>, Frédéric Lévy<sup>1</sup>, Ludovic Calandreau<sup>1</sup>

7

8

9 <sup>1</sup> INRAE, UMR 85 Physiologie de la Reproduction et des Comportements, F-37380 Nouzilly,  
10 France ; CNRS, UMR 7247, F-37380 Nouzilly, France ; Université François Rabelais, F-37041  
11 Tours, France ; IFCE, F-37380 Nouzilly, France.

12 <sup>2</sup> JUNIA ISA, 48 bd Vauban 59046 Lille Cedex, France

13 \* Shared co-first authorship

14

15 Correspondence should be addressed to: Ludovic Calandreau, INRAE, UMR 85 Physiologie  
16 de la Reproduction et des Comportements, 37380 Nouzilly, France.

17 Tel : +33 2 47 42 75 71

18 Fax : +33 2 47 42 77 43

19 E-mail: ludovic.calandreau@inrae.fr

20

21

22

23

24

25 **Abstract**

26 It is now well-accepted that memory is a dynamic process, and that stress and training level may  
27 influence which memory system an individual engages when solving a task. In this work, we  
28 investigated whether and how chronic stress impacts spatial and cue-based memories according to  
29 training level. To that aim, control and chronically stressed Japanese quail were trained in a task that  
30 could be solved using spatial and cue-based memory and tested for their memory performances after 5  
31 and 15 training days (initial training and overtraining, respectively) and following an emotional  
32 challenge (exposure to an open field). While chronic stress negatively impacted spatial memory in  
33 chronically stressed birds after initial training, this impact was lowered after overtraining compared to  
34 control quail. Interestingly, the emotional challenge reinstated the differences in performance between  
35 the two groups, revealing that chronic stress/overtraining did not eliminate spatial memory. Differences  
36 caused by previous stressors can re-emerge depending on the more immediate psychological state of the  
37 individual. Contrary to spatial memory, cue-based memory was not impaired in any test occasion,  
38 confirming that this form of memory is resistant to chronic stress. Altogether these findings reveal a  
39 dynamic dialogue between stress, training, and memory systems in birds.

40

41 Keywords: bird cognition; chronic stress; spatial memory; cue-based memory; overtraining; Japanese  
42 quail.

43

44

45

46

47

48

49

50

51

52

53

54 **1. Introduction**

55

56 It has long been recognized that chronic stress strongly modulates learning and memory  
57 performances [1–3]. However, the relationship between chronic stress and memory are still  
58 controversial: some studies reported an improving effect of chronic stress on memory performances [4–  
59 6], whereas others reported a negative effect [6–8]. Overall, chronic stress generally provokes memory  
60 impairment for complex tasks and improves simple tasks [3]. These discrepancies support the fact that  
61 memory is not a single unit. Different parts of the brain are responsible for different memory systems  
62 that process different types of information and are differently affected by stress [9].

63 Two memory systems have had a considerable amount of scientific interest in the last decades  
64 as they present strong parallels between humans and animals. The first one is spatial memory, a form of  
65 declarative memory based on the hippocampus and used mainly to establish a relationship between  
66 different cues from the environment, which allow the creation of a cognitive mental map [10,11]. As the  
67 cues from the environment are treated in relation to each other, the spatial memory is considered to be  
68 more complex than the cue-based memory, a non-declarative form of memory that results from a simple  
69 association between a salient cue and the target and is based on the striatum [9,12,13]. Studies have  
70 shown that chronic stress has a strong and negative impact on declarative memory, such as spatial  
71 memory [1,3,6,7,14,15], whereas it spares or even improves forms of non-declarative memory  
72 [5,6,15,16].

73 Beyond chronic stress, the training level can also influence the use of multiple memory systems  
74 [9,17–20]. Indeed, rats trained to learn the location of a reward in a maze preferentially use their spatial  
75 memory after a few days of training and shift to a cue-based dominant response with overtraining [21].  
76 Training and stress levels may also interact: the initial differences in memory performances due to stress  
77 may disappear with overtraining [3]. Other studies suggest training itself may be a source of stress and  
78 reduce hippocampal neurogenesis [22,23], which could explain the shift between memory systems.  
79 While much is known on chronic stress effects on declarative spatial or non-declarative cue-based  
80 memory performances, the influence of the level of training and its interaction with chronic stress  
81 influence remains poorly understood.

82 Using the Japanese quail (*Coturnix coturnix*) as the animal model, in this work, we investigated  
83 whether and how chronic stress could differentially impact spatial and cue-based memories according  
84 to the level of training. Control and chronically stressed Japanese quail were trained in a dual  
85 spatial/cued task, which could be solved either using the spatial or cue-based memories and tested for  
86 their performances on each type of memory after five and fifteen training days. Additionally, as an  
87 animal's immediate psychological state may interact with chronic stress and impact the relative use of  
88 different memory systems and memory performances [24,25], a series of tests were conducted after an  
89 emotional challenge that consisted of exposing quail to an unfamiliar environment (open field). Finally,

90 birds were submitted to a test to assess whether they learn to find the target cup by a simple association  
91 between the target cup's colour and the reward or by detecting the difference of colours between the  
92 target cup and the remaining cups. Based on the literature, we expected chronically stressed quail to  
93 show lower performance in the spatial memory test than control ones after initial training (five days of  
94 training). These differences were expected to lower or disappear after overtraining (fifteen days of  
95 training) and reinstated after the emotional challenge. Concerning the cue-based memory, we expected  
96 no differences between chronically stressed and control quail. Since this is a simple form of memory,  
97 we expected the emotional challenge would not disrupt it.

98

## 99 **2. Methods**

100

### 101 **2.1. Animals**

102

103 All Japanese quail were bred and maintained at the Pôle d'Expérimentation Avicole de Tours  
104 (UE PEAT, INRAE, 2018. Experimental Poultry Facility, DOI: 10.15454/1.5572326250887292E12)  
105 where the experiment took place. On the day of hatching, chicks were transferred to communal floor  
106 pens. On the 21<sup>st</sup> day after hatching, chicks were sexed by feather dimorphism, and males were reared  
107 in a single home cage (41×51×25 cm) in a battery under a 12:12h light-dark schedule (light on 08h). A  
108 piece of artificial turf was placed on the cage floor to allow animals to exhibit dust bathing behaviour.  
109 The ambient temperature was maintained at approximately 20±2°C. Unless otherwise specified, food  
110 and water were provided *ad libitum*.

111 Animal care and experimental treatments complied with the French Ministry of Agriculture  
112 guidelines for animal experimentation and European regulations on animal experimentation  
113 (86/609/EEC). They were performed following the local animal regulation (authorized C37-175-1) of  
114 the French Ministry of Agriculture under the EEC directive and under ethics committee approval (Val  
115 de Loire, agreement N° 1789 and 1848).

116

117

### 118 **2.2. Chronic stress procedure**

119

120 At 21th day of age, when quail were transferred in individual cages, they were divided into two  
121 groups, a control and a chronic stress group. Quail from the chronic stress group were submitted to  
122 chronic unpredictable stress (CUS) for 21 days consisting of five to six negative stimulations or stressors  
123 per day. To improve the unpredictability of the stressor delivery and decrease habituation to the stress  
124 procedure, each stressor occurred at unpredictable times each day during both night and day. The CUS  
125 procedure has been fully described and was shown to induce a state of chronic stress in quail [15,26–

126 30]. Briefly, some stressors were delivered directly in the home cage of the quail: confinement of the  
127 bird in the corner of its home cage for 30min, food frustration by placing transparent devices on the  
128 feeder just before light on for 30min, soft home cage shaking (2×15 min interspaced by 15 min),  
129 unexpected sounds (100 dB) composed of different sounds having or not biological signification for  
130 quail. Disturbances from outside the home cage were also delivered, such as a rapid passage of a plastic  
131 stick on the rods of the home cage twice a day for 2 min, fast sprayings of water or air on feathers (2  
132 sprays interspaced by 2 min), waving of a plastic flag in front of the home cage for 2 min. Other stressors  
133 were also delivered out of the home cage when birds were transferred individually into a new  
134 environment for 30 min. Birds from the same line were also placed together in a transport cage for 30  
135 min or placed on a cart and rolled about in the facility.

136 The control group was left undisturbed except for routine husbandry procedures similar to those  
137 provided to birds exposed to CUS. The experimenter regularly visited the control quail room to spend  
138 the same amount of time with control and chronically stressed birds. Systematically, when stressors  
139 prevented animals from having access to food, an opaque device was placed on the feeder of control  
140 birds to prevent them from eating food for an equivalent time.

141

142

### 143 **2.3. Learning and memory task**

144

145 At the end of the CUS procedure, 17 control and 20 chronically stressed birds were submitted  
146 to a training procedure followed by a series of memory tests (Figure 1). Briefly, after preliminary phases  
147 dedicated to familiarized birds to the food reward (mealworms), the cups and the arena, control and  
148 chronically stressed birds were submitted to a dual spatial/cued task during five days that consisted of  
149 learning to find food (mealworm) hidden in a single cup (target cup) in an arena that contained eight  
150 opaque cups. On each trial, birds were introduced in the arena by a different starting point among three  
151 possibilities. The location of the target cup was constant among trials and days of training, allowing  
152 animals to solve the task using spatial memory. Moreover, the target cup was black, whereas other non-  
153 target cups were white. Thus, birds could also solve this task using their cue-based memory, based on  
154 the colour of the cup.

155 The day after the fifth day of training, birds were submitted to a spatial test followed by a  
156 displacement test. During the spatial test, all cups were white, and the task could only be solved by  
157 remembering the spatial location of the target cup during the training phase. During the displacement  
158 test, performed 30 min later, the black target cup was displaced to a new position (different from the  
159 position used during training). Thus, both spatial and cue-based memories could provide a solution to  
160 the test. Quail could go back either to the spatial location of the target cup during the training phase  
161 (spatial memory) or go directly to the displaced black cup (cue-based memory) [15,31,32].

162 After this first test occasion, birds were trained for ten additional days in the dual spatial/cued  
 163 task before being submitted to the second test occasion of spatial and displacement tests. Following the  
 164 second test occasion, birds were trained for an additional day (recall training) in the dual spatial/cued  
 165 task to avoid that lack of food during the second test occasion reduced bird motivation in subsequent  
 166 tests. After this first recall training day, all birds were challenged by exposure to an open field test and  
 167 were submitted to the third occasion of spatial and displacement tests.

168 On the following day, quail were submitted to a second additional training day (recall training)  
 169 to keep birds motivated. The day after, birds were submitted to a new test, called "colour test", to assess  
 170 whether birds found the target cup by a simple association between its colour (black) and the reward or  
 171 by learning a more general rule that the target cup was of a different colour compared to the remaining  
 172 cups.

173 During all the memory tests, behaviours of quail were recorded by a camera placed above the  
 174 apparatus and computerized by a tracking video system (Ethovision XT; Noldus IT, The Netherlands).

175  
 176  
 177

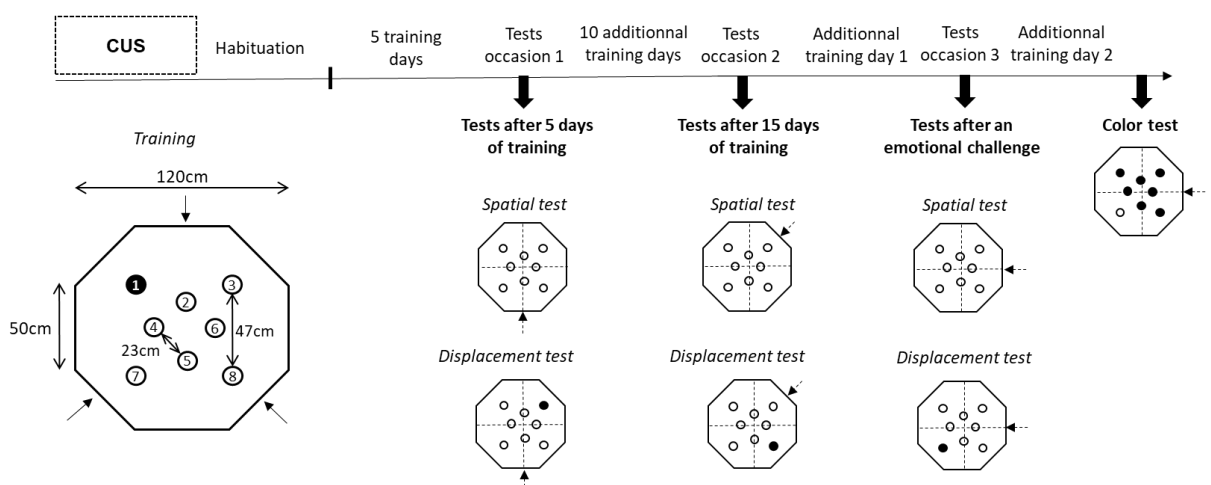

178  
 179 **Figure 1: Schedule of the experiment and schematic representation of the apparatus used**  
 180 **for training and testing.** At three-weeks-old, quail were submitted to chronic unpredictable stress  
 181 (CUS) for three weeks. At the end of the CUS procedure, stressed and control birds were trained in a  
 182 dual spatial/cued learning task and submitted to spatial and displacement memory tests after 5 and 15  
 183 days of training. After an additional training day, quail were submitted to an emotional challenge  
 184 (exposure to an open field) followed by a new series of tests. After the last training day, birds were  
 185 submitted to the colour test. Quail could enter the arena from three different starting points (dark arrows),  
 186 three starting points during training, and one during testing. The dotted lines represent the division of  
 187 apparatus into four different quadrants.

188  
 189

190  
191  
192  
193  
194  
195  
196  
197  
198  
199  
200  
201  
202  
203  
204  
205  
206  
207  
208  
209  
210  
211  
212  
213  
214  
215  
216  
217  
218  
219  
220  
221  
222  
223  
224  
225  
226

## 2.4. The dual spatial/cued task

The following procedures and the arena used for the task were previously used and validated by our group in chickens and quails [13,15,32,33].

### 2.4.1. Mealworms familiarization

One week before the beginning of training, a brown ceramic cup (6x7cm) was placed in each quail's home cage. For seven days, three times per day (spaced about 3h), 3 or 4 mealworms were deposited in the cup to familiarize birds with the cups and mealworms.

### 2.4.2. Habituation

The day following the end of the familiarization phase, birds were submitted to the habituation phase. One hour before each habituation session, food was removed from the home cage of the animals. During five days, once a day, each quail was introduced into the centre of a beige octagonal arena (120cm long; 50cm high) surrounded by a blue curtain (1.90m high) and lighted by a bulb at the ceiling (18 Lux). Four black spatial cues were placed on the walls of the arena and four others on the curtain. Eight ceramic cups similar to those used for the familiarization were placed in the arena and contained mealworms. Four cups were covered with white paper, whereas black paper covered another four cups. Each bird was allowed to explore the arena and the cups in each habituation session until it found and ate all mealworms or after a maximum time of 600 s. Between each quail and day of habituation, the position of black and white cups was randomly moved. On each day, the number of cups visited was recorded to estimate the level of exploration and habituation of the birds (Figure 1).

### 2.4.3. Training

On each day of training, birds were submitted to 2 training trials per day with an inter-trial interval of 1 hour. On each trial, birds were introduced in the arena by a different starting point among three possibilities (Figure 1). Only one cup was rewarded and contained three mealworms (target cup). The target cup was always black and at a fixed position on each trial, whereas the seven other cups were non-rewarded and white. The trial ended when the bird reached the target cup and ate the mealworms, or after a maximum time of 300 s. If the bird did not find the target cup, it was gently guided to it and allowed to eat the mealworms before being removed from the arena. Between each trial, the bird returned to its home cage. The latency to find and eat the food in the rewarded black cup was recorded on each trial.

227  
228  
229  
230  
231  
232  
233  
234  
235  
236  
237  
238  
239  
240  
241  
242  
243  
244  
245  
246  
247  
248  
249  
250  
251  
252  
253  
254  
255  
256  
257  
258  
259  
260  
261  
262  
263

#### 2.4.4. *The spatial test*

This test was used to assess the impact of chronic stress on spatial memory. Each bird was allowed to freely explore the arena and the 8 cups for 1 minute. All cups were empty and, more importantly, of similar colour (white). The number of cups visited (number of errors) before reaching the target cup was scored. Moreover, the arena was virtually divided into four equal quadrants, and the time spent in each quadrant (spatial quadrant and three other quadrants) during the test was measured using the tracking video system (Figure 1). The time spent on the three other quadrants was averaged.

The spatial test was conducted after 5 and 15 days of training (initial training and overtraining, henceforth) and after an emotional challenge by exposing birds to an open field (emotional challenge, henceforth).

#### 2.4.5. *The displacement test*

The displacement test was used to assess the impact of chronic stress on the use of spatial and cue-based memory systems. It was systematically conducted 30 min after the spatial test. During this test, similarly to the training phase, the arena was equipped with one black cup and seven white cups, but all cups were empty of food. The black cup was displaced to a new position (Figure 1). The new position was changed for each test conducted after initial training, overtraining, and emotional challenge. All birds were allowed to explore the arena and the cups for 1 min freely. The number of errors before reaching the spatial and displaced cup was scored. Similar to the spatial test, the arena was virtually divided into four equal quadrants (spatial quadrant, displaced cup quadrant, and two other quadrants), and the time spent in each quadrant during the test was measured using the tracking video system. The time spent on the two other quadrants was averaged.

#### 2.4.6. *Tests after an emotional challenge*

The third occasion of both tests (spatial and displacement tests) was conducted after an emotional challenge. This emotional challenge consisted of exposing the birds to an open field test, which is known to provoke anxiety-like quail behaviors [15,34,35]. Each quail was individually placed in the centre of a square arena (80 × 80 × 80 cm) of white wood with a beige linoleum floor. The arena was placed into a new experimental room, surrounded by a green curtain and strongly lighted (50 lux). Each quail was allowed to explore the arena for 5 min before being withdrawn from the arena. Thirty minutes after the open field test, quail were submitted to a spatial test followed by a displacement test.



264           2.4.7. *The colour test*

265

266           This test aimed to assess whether birds learn to find the target cup by a simple association  
267 between its colour (black) and the reward or by detecting the difference of colours between the target  
268 cup and the remaining cups (Figure 1). Each bird was allowed to freely explore the arena and the eight  
269 cups for 1 minute. All cups were empty and black, except for one white cup and not located in the spatial  
270 position used for training. The number of visits before reaching the white cup was scored. Moreover,  
271 the number of visits before reaching the black cup located in the spatial location used during training  
272 was scored and compared to those to reach the white cup and other black cups. As for previous tests, the  
273 time spent in the four equal quadrants (white cup quadrant, spatial black cup quadrant, and two other  
274 black cup quadrants) of the arena was measured. This test was performed after a second recall training  
275 day conducted the day after the third test occasion.

276

277           **2.5. Statistical analysis**

278

279           Data from habituation (number of cups visited) and from training (latency to reach the target  
280 cup) were analysed by parametric analyses of variance (ANOVA repeated measures) with stress group  
281 (control and chronically stressed quail) as between-subject factors and days (mean values for both  
282 training trials within days) as within-subject factors.

283           For spatial, displacement, and colour tests, the number of errors (or visits) before reaching the  
284 target cup(s) and the time spent in the different quadrant of the arena were analysed by ANOVA with  
285 groups (control and stressed) as between-subject factors and test occasions (test after initial training, test  
286 after overtraining and test after the emotional challenge) as within-subject factors. Additional within-  
287 subject factors (e.g., quadrants or cups considered) were also included, dependent on the variables under  
288 consideration. When main effects or interactions were significant, analyses were followed by multiple  
289 comparisons corrected by Tukey HSD.

290           When quail did not find a target cup and visited less than 4 cups, they were considered non-  
291 explorer. For these birds, a number of 8 errors and an equivalent time of 15 sec in each quadrant were  
292 attributed. All statistical analyses were performed using IBM SPSS 21 and R version 3.6.1. Statistical  
293 significance was set at  $p < 0.05$ .

294

295

296

297

298

299

300

301

### 302 3. RESULTS

303

#### 304 3.1. Effect of chronic stress on habituation and training in the dual spatial/cued task

305

306 During habituation, both groups visited more cups and ate significantly more mealworms over  
307 days without any differences between control and chronically stress quail (effect of days:  $F_{4,140}=18.15$ ,  
308  $p<0.001$ ; effect of stress:  $F_{1,35}=0.13$ ,  $p=0.72$ ; interaction days x stress:  $F_{4,140}=1.11$ ,  $p=0.35$ ; Figure 2a).

309 During the initial training period, both groups similarly learned the location of the target cup  
310 since the latency to find the target cup significantly decreased over days (effect of days:  $F_{4,140}=19.60$ ,  
311  $p<0.001$ ; effect of stress:  $F_{1,35}=0.28$ ,  $p=0.60$ ; interaction days x stress:  $F_{4,140}=0.93$ ,  $p=0.45$ ; Figure 2).  
312 Similarly, during the overtraining period, the latency to reach the target cup significantly decreased  
313 without any effect of chronic stress (effect of days:  $F_{9,315}=5.89$ ,  $p<0.001$ ; stress effect:  $F_{1,35}=0.13$ ,  
314  $p=0.73$ ; interaction days x stress:  $F_{9,315}=0.58$ ,  $p=0.81$ ; Figure 2b).

315 The latency between the last day of overtraining (the fifteenth day of training) and the recall  
316 period between tests (last two additional days) was not different between days, nor between control and  
317 chronically stressed quail (effect of days:  $F_{2,70}=1.12$ ,  $p=0.33$ ; effect of stress:  $F_{1,35}=0.65$ ,  $p=0.42$ ;  
318 interaction days x stress:  $F_{2,70}=1.10$ ,  $p=0.33$ ), indicating that animals reached a learning plateau.

319

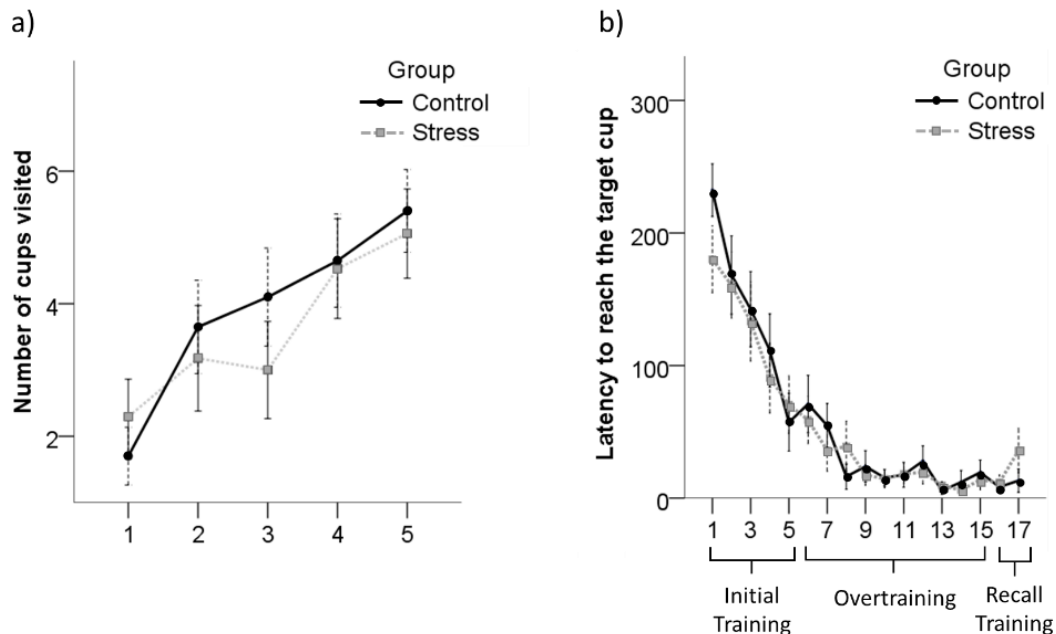

320

321 **Figure 2: Effects of chronic stress on habituation and training performances in the dual**

322 **spatial/cued task. a) Number of visited cups over days of habituation in control and chronically stressed**

323 **quail. During habituation, all eight cups were rewarded with mealworms. b) Latency to reach the**

324 location of the target cup over days of training in control and chronically stressed quail. Mean  $\pm$  SEM  
 325 are given.

### 326 3.2. Effect of chronic stress during the spatial test

327

328 The number of errors made before reaching the spatial cup was significantly increased in  
 329 chronically stressed quail (effect of stress:  $F_{1,35}=5.62$ ,  $p=0.023$ , Figure 3a), independently of the test  
 330 occasion and the interaction with stress (effect of test occasion:  $F_{2,70}=1.45$ ,  $p=0.24$ ; interaction test  
 331 occasion x stress:  $F_{2,70}=2.72$ ,  $p=0.072$ ).

332 The time spent in the spatial quadrant compared to other quadrants was affected by the quadrant  
 333 considered, stress, and the interaction quadrant, test occasion and stress (effect of quadrant:  $F_{1,35}=7.58$ ,  
 334  $p=0.009$ ; effect of stress:  $F_{1,35}=6.13$ ,  $p=0.018$ ; interaction quadrant x test occasion x stress:  $F_{2,70}=3.36$ ,  
 335  $p=0.040$ ). Post-hoc analyses revealed that, during the tests after the initial training and the emotional  
 336 challenge, control birds spent significantly more time in the spatial quadrant compared to other  
 337 quadrants ( $p<0.001$  and  $p=0.001$ , for the tests after the initial training and the emotional challenge,  
 338 respectively). In contrast, chronically stressed birds spent an equivalent time in the spatial quadrant  
 339 compared to other quadrants ( $p=1$  and  $p=1$  for the tests after the initial training and the emotional  
 340 challenge, respectively, Figure 3b). No differences were found for the test after overtraining: both  
 341 control and chronically stressed quail spent an equivalent time in the spatial quadrant compared with  
 342 other quadrants ( $p=1$  and  $p=1$ , for control and chronically stressed quail, respectively, Figure 3b).

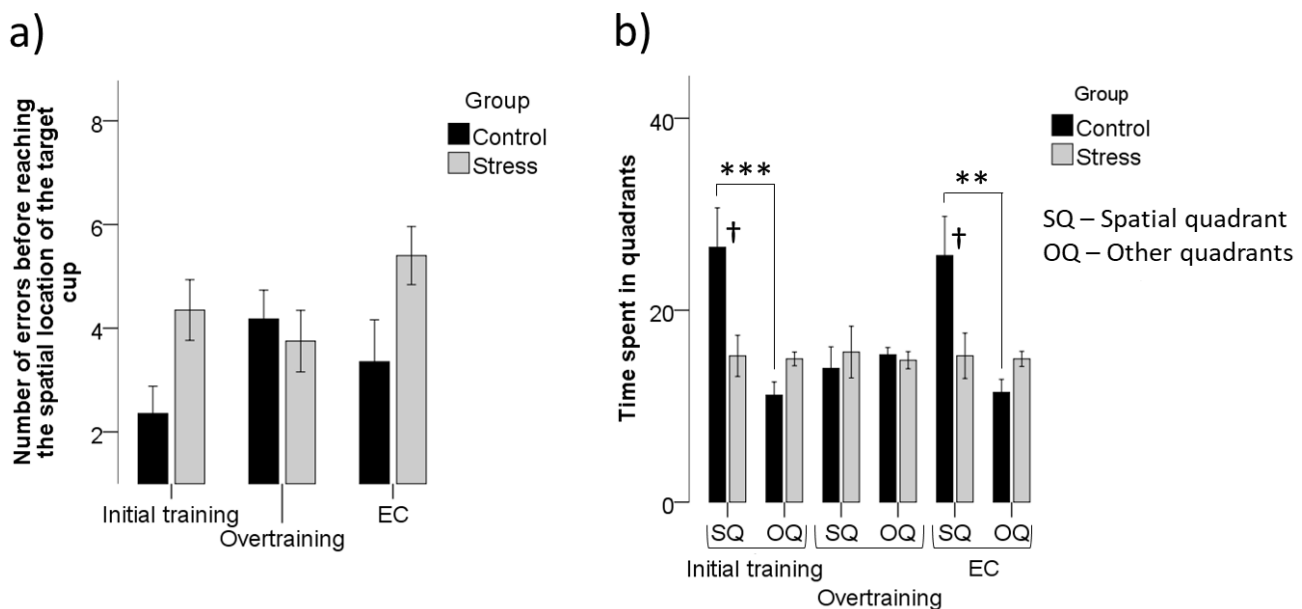

343 **Figure 3. Effects of chronic stress in spatial memory tests performed after initial training (5 days),**  
 344 **overtraining (15 days), and after an emotional challenge (EC, exposure to an open field). a)**  
 345 **Number of errors before reaching the spatial location of the target cup, and b) Time (in seconds) spent**  
 346 **in different quadrants of the arena (spatial and other quadrants). †  $p\leq 0.05$ , significant difference between**

347 control and chronically stressed quail. \*\*  $p \leq 0.01$ ; \*\*\*  $p \leq 0.001$ , significant difference between the spatial  
348 quadrant and other quadrants. Mean  $\pm$  SEM are given.

### 349 **3.3. Effect of chronic stress during the displacement test**

350

351 Analyses on the number of errors made before reaching the target cups (either the spatial cup or  
352 the displaced cup) showed that animals were more performant to reach the displaced cup, independent  
353 of their treatment group. There was also a significant interaction between the test occasion and the target  
354 cups (effect of target cup:  $F_{1,35}=100.71$ ,  $p < 0.001$ ; effect of test occasion:  $F_{2,70}=3.22$ ,  $p=0.046$ ; effect of  
355 stress:  $F_{1,35}=0.010$ ,  $p=0.92$ ; interaction target cup x stress:  $F_{1,35}=0.27$ ,  $p=0.6$ ; interaction target cup x test  
356 occasion:  $F_{2,70}=8.26$ ,  $p=0.001$ ; interaction target cup x test occasion x stress:  $F_{2,70}=0.87$ ,  $p=0.42$ ). Post-  
357 hoc analyses revealed animals did significantly fewer errors before reaching the displaced cup in all test  
358 occasions, compared to the errors before reaching the spatial cup ( $p=0.001$ ,  $p < 0.001$  and  $p < 0.001$ , for  
359 the tests performed after initial training, overtraining, and just after the emotional challenge,  
360 respectively, Figure 4a). Between test occasions and within-target cup, post-hoc comparisons revealed  
361 that animals made significantly fewer errors before reaching the displaced cup during the tests after  
362 overtraining and after the emotional challenge, compared to the test after initial training ( $p=0.001$  and  
363  $p=0.005$ , respectively, Figure 4a).

364 Analyses on time spent in different quadrants showed that animals did not spend their time  
365 evenly between quadrants. They spent significantly more time than the chance level in the displaced cup  
366 quadrant independent of their treatment group. There was also significant a significant interaction  
367 between the test occasion and the time spent in different quadrants (effect of quadrants:  $F_{2,70}=67.19$ ,  
368  $p < 0.001$ ; effect of test occasion:  $F_{2,70}=0.82$ ,  $p=0.44$ ; effect of stress:  $F_{1,35}=3.81$ ,  $p=0.059$ ; interaction  
369 quadrants x stress:  $F_{2,70}=1.09$ ,  $p=0.34$ ; interaction quadrants x test occasion:  $F_{4,140}=3.25$ ,  $p=0.014$ .  
370 interaction quadrants x test occasion x stress:  $F_{4,140}=0.42$ ,  $p=0.78$ ). Post-hoc analyses revealed that the  
371 time spent in the displaced cup quadrant was higher for all test occasions compared to those spent on  
372 the spatial quadrant and other quadrants ( $p < 0.05$ , for the tests performed after initial training,  
373 overtraining, and just after the emotional challenge, respectively, Figure 4b).

374

375

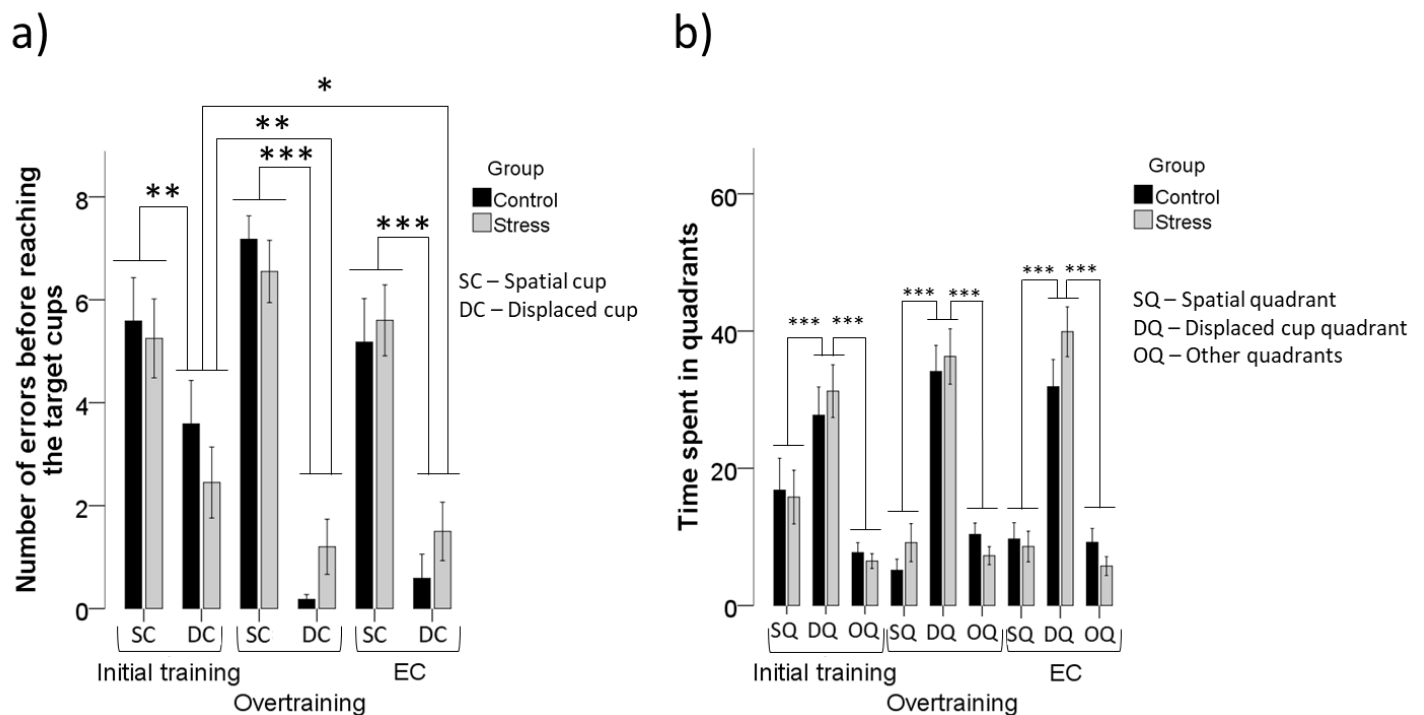

376

377 **Figure 4. Effects of chronic stress in the displacement tests performed after initial training (5**  
 378 **days), overtraining (15 days), and after an emotional challenge (EC, exposure to an open field). a)**  
 379 **Number of errors before reaching the target cups (spatial cup or displaced cup), and b) Time (in seconds)**  
 380 **spent in different quadrants of the arena (either the spatial quadrant, SQ, the displaced cup quadrant,**  
 381 **DQ, or the other quadrants, OQ). \*  $p \leq 0.05$ ; \*\*  $p \leq 0.01$ ; \*\*\*  $p \leq 0.001$ , significant difference between the**  
 382 **spatial cup and displaced cup or between spatial quadrant, displaced cup quadrant, and other quadrants.**  
 383 **Mean  $\pm$  SEM are given.**

384

### 385 3.4. Effect of chronic stress during the colour test

386

387 During the colour test, independently of chronic stress, the number of visits made before  
 388 reaching a cup was different depending on the cup considered (effect of cup:  $F_{2,70}=18.60$ ,  $p < 0.0001$ ;  
 389 effect of stress:  $F_{1,35}=0.03$ ,  $p=0.87$ ; interaction cup x stress:  $F_{2,70}=0.06$ ,  $p=0.95$ ; Figure 5). Post-hoc  
 390 analyses showed that the number of visits before reaching the spatial black cup was significantly lower  
 391 than those performed before reaching other black cups or the white cup ( $p=0.02$  and  $p < 0.001$ ,  
 392 respectively, Figure 5a).

393 Finally, the time spent in the different quadrants was also significantly dependent on the  
394 quadrant considered (effect of quadrants:  $F_{2,70}=3.62$ ,  $p=0.032$ ). Post-hoc analyses revealed a  
395 significantly larger amount of time spent in the black spatial cup quadrant compared to other black cups  
396 and white cup quadrants ( $p=0.01$ ). No differences were found between the treatment groups, nor for the  
397 interaction quadrants and treatment groups (effect of stress:  $F_{1,35}=1.02$ ,  $p=0.31$ ; interaction quadrants x  
398 stress:  $F_{2,70}=0.59$ ,  $p=0.55$ , Figure 5b).

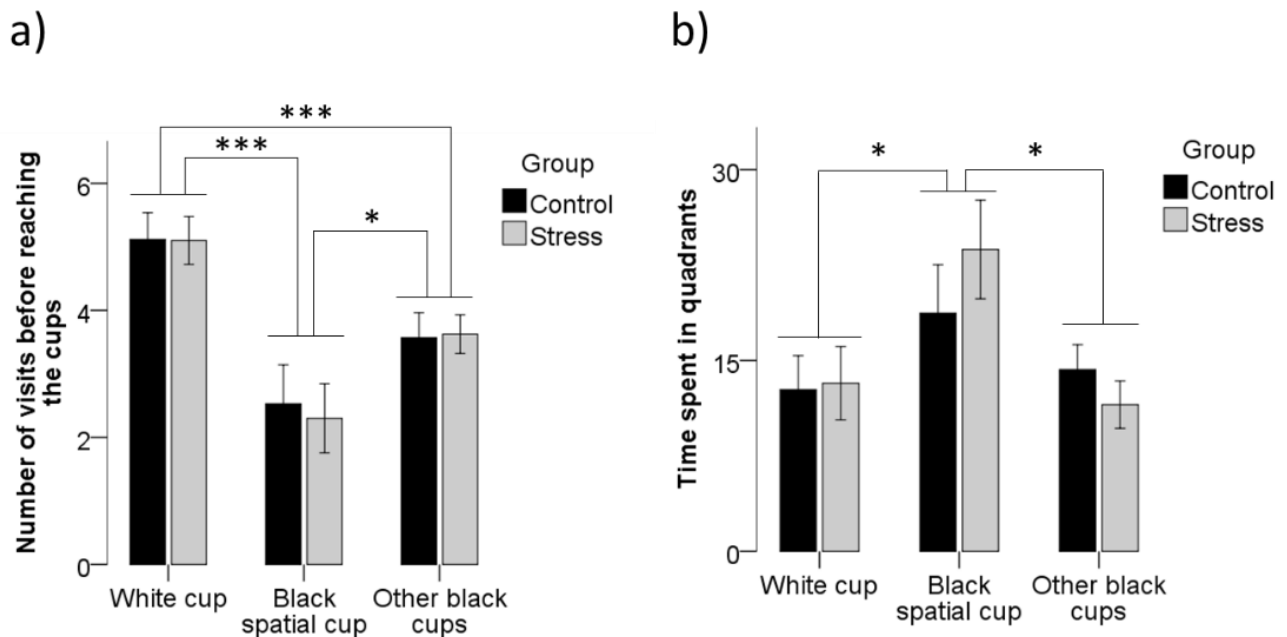

399 **Figure 5. Effects of chronic stress on the colour test.** a) Number of visits before reaching the white  
400 cup, the black spatial cup, or other black cups in chronically stressed and control birds and b) Time (in  
401 seconds) spent in different quadrants of the arena containing the white cup, the spatial black cup, other  
402 black cups in chronically stressed and control birds. \*  $p \leq 0.05$ ; \*\*  $p \leq 0.01$ ; \*\*\*  $p \leq 0.001$ , significant  
403 difference between the white cup, black spatial cup, and other black cups. Mean  $\pm$  SEM are given.

404

#### 405 4. DISCUSSION

406

407 The main objective of the present study was to address, in birds, whether chronic stress can  
408 differentially impact two forms of long-term memory, the declarative spatial and the non-declarative  
409 cue-based memories, according to the level of training. To this end, control and chronically stressed  
410 Japanese quail were trained in a task that could be solved using spatial and cue-based memory, the dual  
411 spatial/cued task, and tested for their performances on each type of memory after 5 and 15 days of  
412 training (initial training and overtraining, respectively). Our results showed that the spatial memory of  
413 quail was sensitive to the deleterious effect of chronic stress. Performances of chronically stressed birds  
414 during the spatial test after initial training were impaired compared to that of control birds. During the  
415 test after overtraining, however, these differences were lowered. Interestingly, during the test after an

416 emotional challenge, when birds were exposed to an open field, the negative impact of chronic stress on  
417 spatial memory performances was fully reinstated. These findings indicate that the relationships between  
418 chronic stress and spatial memory are complex and dynamic. By contrast, cue-based memory was not  
419 affected in chronically stressed birds compared to control birds on any test occasion. Thus, this form of  
420 memory is relatively resistant to the negative effect of chronic stress. Finally, a test conducted to better  
421 qualify birds' cue-based memory performances, the colour test, provided support that chronically  
422 stressed birds were still able to efficiently remember the spatial location of the target cup when this  
423 location was signalled by a colour similar to that used during training. This suggests that chronically  
424 stressed birds cannot efficiently recall stored spatial information in a context different from the one  
425 experienced during training, which highlights that chronic stress reduces the ability to use spatial  
426 memory flexibly.

427         Our results from habituation showed that the number of mealworms eaten increased over days  
428 without any significant effect of chronic stress. Moreover, the latency to reach the target cup decreased  
429 over days of training in both groups. These findings indicate that both control and chronically stressed  
430 birds similarly habituated to the arena and the cups and similarly learned the dual spatial/cued task. They  
431 also indicate differences between groups observed during the different tests performed could not be  
432 attributed to evident motor or motivational differences and instead reflect stress-related changes in  
433 memory performances.

434         During the spatial test, the number of errors before reaching the spatial location of the target cup  
435 was higher in all test occasions (initial training, overtraining, after an emotional challenge) for  
436 chronically stressed birds compared to control birds, evidencing the negative impact of chronic stress  
437 on spatial memory performances. Although not significant ( $p=0.07$ ), the interaction between test  
438 occasion and stress suggests that the performance of both groups during overtraining tests was similar,  
439 compared to initial training and after emotional challenge tests, when their performances differed more.  
440 Confirming this tendency, the time spent in different quadrants revealed some specificities of the  
441 animals' performance over the different test occasions. During spatial tests performed after initial  
442 training, chronically stressed birds spent their time evenly between the quadrants, while control birds  
443 spent significantly more time in the spatial quadrant. The same did not occur after overtraining. Indeed,  
444 performances of both control and chronically stressed birds were relatively low during the spatial test  
445 performed after overtraining. Contrasting to the spatial tests, chronic stress did not affect cue-based  
446 memory performances in all displacement tests performed. In all test occasions, chronically stressed  
447 birds and control had the same performance and followed the displaced black cup preferentially. These  
448 findings indicate that chronic stress differentially impacts memory depending on the memory system,  
449 with the spatial memory being much more sensitive to the adverse effects of chronic stress than the cue-  
450 based memory [1,3,6,36].

451         Our results suggest that chronic stress has a stronger detrimental effect on spatial memory at  
452 early stages compared to the late stages of training. They confirm previous studies in birds and mammals

453 reporting chronic stress that can negatively impact this memory system [1,3,6,7,15]. Moreover, the  
454 lowering of chronic stress effects on spatial memory performances after overtraining may be explained  
455 by a progressive acquisition of a predominant cue-based strategy to solve the spatial test over days of  
456 training. In mammals, it is well documented that the involvement of memory systems is a dynamic  
457 process that can vary over time of training. In particular, overtraining in mammals favours cue-based  
458 memory [17,18,20,21]. In line with this, the number of errors to reach the black target cup during the  
459 displacement tests decreased with training, evidencing an improvement of this type of memory over  
460 time. These results confirm the idea that the protective effect of an extended period of training on the  
461 negative consequences of chronic stress on memory may be due to a progressive shift toward a non-  
462 declarative, cue-based memory system.

463 An alternative explanation for these results could be that extensive exposure to the task was  
464 perceived, by the control animals, as stressful on its own, worsening their performance. For rats, while  
465 a 4-day training did not impact brain plasticity, a 14-day training schedule drastically reduced  
466 hippocampal neurogenesis [23,37]. If that is the case, it is noteworthy to state that the stress from  
467 overtraining compared to the CUS procedure was perceived differently by the animals since the negative  
468 effect of chronic stress on spatial memory performances were specifically restored after an emotional  
469 challenge. Previous studies highlight that acute stress or stress hormone injections experienced just  
470 before testing can induce the re-emergence of an extinguished memory [24,25]. These results suggest  
471 that the progressive shift toward a cue-based memory system by control quail after an extending period  
472 of training is not due to the elimination of the spatial memory, which can re-emerge depending on the  
473 more immediate psychological state of the quail. Similarly, studies on mammals have shown that the  
474 shift from spatial memory to cue-based memory with increased training is not due to the elimination of  
475 the spatial memory [18,21]. Moreover, even after overtraining, the reappearance of chronic stress  
476 adverse effects on the spatial memory of chronically stressed quail could indicate a long-lasting  
477 sensibility of this memory system.

478 Finally, our study highlighted that chronic stress affected specific characteristics of spatial  
479 memory but did not erase this form of memory. Indeed, in the last test, the colour test, control, and  
480 chronically stressed birds made fewer visits before reaching the black cup located in the same spatial  
481 location used during training. Chronically stressed birds seemed thus able to remember the location of  
482 the target cup when this cup was black, as during training. It suggests that chronic stress specifically  
483 impaired the capacity of birds to remember a previously learned location when this location was no  
484 more signalled by the cue (black colour). This capacity is crucial to perform the spatial test efficiently.  
485 Numerous studies conducted in birds and mammals evidenced that spatial memory critically requires  
486 the hippocampus [11,38–42]. In mammals, the hippocampus was shown to be critically involved in  
487 forming distinct memories from events with a high level of similarities (pattern separation) and to re-  
488 establish previously acquired memory by using incomplete information as recall cues (pattern  
489 completion) [43,44]. During spatial tests, the spatial location was no more signalled by the cue (all cups



490 were white). Birds should re-establish the complete spatial-cued information learned during training  
491 (one rewarded black cup among seven non-rewarded white cups) from this incomplete information.  
492 Under this framework, chronic stress, which negatively affects the hippocampus's functioning in quail  
493 [15], may impair hippocampus-dependent processing of pattern completion.

494 In conclusion, the present study presents evidence that chronic stress can negatively impact the  
495 birds' declarative spatial memory. It highlights that chronic stress specifically alters the ability to use  
496 spatial memory flexibly. Also, we show for the first time in birds that an extended period of training can  
497 lower the spatial memory differences between control and chronically stressed individuals, either by a  
498 progressive shift to cue-based memory or by the fact that overtraining can be in itself perceived as  
499 stressful by control animals, hindering their performance. These hypotheses should be tested further. An  
500 emotional challenge, before testing, was capable of reinstating the differences in performance between  
501 chronically stressed and control quail showing the long-lasting sensibility of the spatial memory system.  
502 Altogether these findings reveal an original and dynamic dialogue between stress and memory systems  
503 in birds.

504

#### 505 **ACKNOWLEDGEMENTS**

506

507 This work was supported by the Institut National de Recherche pour l'Agriculture,  
508 l'Alimentation et l'Environnement (INRAE). FL and VHBF were supported by a grant from the French  
509 Region Centre Val de Loire and from JUNIA ISA, respectively. We are grateful to all the members of  
510 the experimental unit PEAT of INRAE (UE PEAT, INRAE, 2018. Experimental Poultry Facility, DOI:  
511 10.15454/1.5572326250887292E12) and particularly to I. Grimaud for providing care to the birds.

512

#### 513 **BIBLIOGRAPHY**

514

- 515 1. Conrad CD. 2010 A critical review of chronic stress effects on spatial learning and memory.  
516 *Prog. Neuro-Psychopharmacology Biol. Psychiatry* **34**, 742–755.  
517 (doi:10.1016/j.pnpbp.2009.11.003)
- 518 2. Luksys G, Sandi C. 2011 Neural mechanisms and computations underlying stress effects on  
519 learning and memory. *Curr. Opin. Neurobiol.* **21**, 502–508. (doi:10.1016/j.conb.2011.03.003)
- 520 3. Sandi C. 2013 Stress and cognition. *Wiley Interdiscip. Rev. Cogn. Sci.* **4**, 245–261.  
521 (doi:10.1002/wcs.1222)
- 522 4. Conboy L, Sandi C. 2010 Stress at Learning Facilitates Memory Formation by Regulating  
523 AMPA Receptor Trafficking Through a Glucocorticoid Action. *Neuropsychopharmacology* **35**,  
524 674–685. (doi:10.1038/npp.2009.172)
- 525 5. Conrad CD, Magariños AM, LeDoux JE, McEwen BS. 1999 Repeated restraint stress  
526 facilitates fear conditioning independently of causing hippocampal CA3 dendritic atrophy.

- 527 *Behav. Neurosci.* **113**, 902–913. (doi:10.1037/0735-7044.113.5.902)
- 528 6. Goodman J, McIntyre CK. 2017 Impaired spatial memory and enhanced habit memory in a rat  
529 model of post-traumatic stress disorder. *Front. Pharmacol.* **8**, 1–8.  
530 (doi:10.3389/fphar.2017.00663)
- 531 7. Moreira PS, Almeida PR, Leite-Almeida H, Sousa N, Costa P. 2016 Impact of chronic stress  
532 protocols in learning and memory in rodents: Systematic review and meta-analysis. *PLoS One*  
533 **11**, 1–24. (doi:10.1371/journal.pone.0163245)
- 534 8. Wright RL, Conrad CD. 2008 Enriched environment prevents chronic stress-induced spatial  
535 learning and memory deficits. *Behav. Brain Res.* **187**, 41–47.  
536 (doi:10.1016/j.bbr.2007.08.025.Enriched)
- 537 9. Packard MG, Goodman J. 2013 Factors that influence the relative use of multiple memory  
538 systems. *Hippocampus* **23**, 1044–1052. (doi:10.1002/hipo.22178)
- 539 10. O'keefe J, Nadel L. 1978 *The hippocampus as a cognitive map*. Oxford: Clarendon Press.  
540 (doi:10.1016/j.neuron.2015.06.013)
- 541 11. Morris RGM, Garrud P, Rawlins JNP, O'Keefe J. 1982 Place navigation impaired in rats with  
542 hippocampal lesions. *Nature* **297**, 681–683. (doi:10.1038/297681a0)
- 543 12. White NM, McDonald RJ. 2002 Multiple Parallel Memory Systems in the Brain of the Rat.  
544 *Neurobiol. Learn. Mem.* **77**, 125–184. (doi:10.1006/nlme.2001.4008)
- 545 13. Lormant F, Cornilleau F, Constantin P, Meurisse M, Lansade L, Leterrier C, Lévy F,  
546 Calandreau L. 2020 Research Note: Role of the hippocampus in spatial memory in Japanese  
547 quail. *Poult. Sci.* **99**, 61–66. (doi:10.3382/ps/pez507)
- 548 14. Conrad CD. 2008 Chronic stress-induced hippocampal vulnerability: the glucocorticoid  
549 vulnerability hypothesis. *Rev. Neurosci.* **19**, 395–411.
- 550 15. Lormant F *et al.* 2020 Emotionality modulates the impact of chronic stress on memory and  
551 neurogenesis in birds. *Sci. Rep.* **10**, 14620. (doi:10.1038/s41598-020-71680-w)
- 552 16. Miracle AD, Brace MF, Huyck KD, Singler SA, Wellman CL. 2006 Chronic stress impairs  
553 recall of extinction of conditioned fear. *Neurobiol. Learn. Mem.* **85**, 213–218.  
554 (doi:10.1016/j.nlm.2005.10.005)
- 555 17. Hicks LH. 1964 Effects of Overtraining on Acquisition and Reversal of Place and Response  
556 Learning. *Psychol. Rep.* **15**, 459–462. (doi:10.2466/pr0.1964.15.2.459)
- 557 18. Packard MG. 2009 Anxiety, cognition, and habit: A multiple memory systems perspective.  
558 *Brain Res.* **1293**, 121–128. (doi:10.1016/j.brainres.2009.03.029)
- 559 19. Packard MG. 2009 Exhumed from thought: Basal ganglia and response learning in the plus-  
560 maze. *Behav. Brain Res.* **199**, 24–31. (doi:10.1016/j.bbr.2008.12.013)
- 561 20. Yin HH, Knowlton BJ. 2006 The role of the basal ganglia in habit formation. *Nat. Rev.*  
562 *Neurosci.* **7**, 464–476. (doi:10.1038/nrn1919)
- 563 21. Packard MG, McGaugh JL. 1996 Inactivation of hippocampus or caudate nucleus with

- 564 lidocaine differentially affects expression of place and response learning. *Neurobiol. Learn.*  
565 *Mem.* **65**, 65–72. (doi:10.1006/nlme.1996.0007)
- 566 22. Ehninger D, Kempermann G. 2006 Paradoxical effects of learning the Morris water maze on  
567 adult hippocampal neurogenesis in mice may be explained by a combination of stress and  
568 physical activity. *Genes, Brain Behav.* **5**, 29–39. (doi:10.1111/j.1601-183X.2005.00129.x)
- 569 23. Aztiria E, Capodici G, Arancio L, Leanza G. 2007 Extensive training in a maze task reduces  
570 neurogenesis in the adult rat dentate gyrus probably as a result of stress. *Neurosci. Lett.* **416**,  
571 133–137. (doi:10.1016/j.neulet.2007.01.069)
- 572 24. Deschaux O, Zheng X, Lavigne J, Nachon O, Cleren C, Moreau JL, Garcia R. 2013 Post-  
573 extinction fluoxetine treatment prevents stress-induced reemergence of extinguished fear.  
574 *Psychopharmacology (Berl)*. **225**, 209–216. (doi:10.1007/s00213-012-2806-x)
- 575 25. Izquierdo LA, Barros DM, Medina JH, Izquierdo I. 2002 Stress hormones enhance retrieval of  
576 fear conditioning acquired either one day or many months before. *Behav. Pharmacol.* **13**, 203–  
577 213. (doi:10.1097/00008877-200205000-00003)
- 578 26. Calandreau L, Bertin A, Boissy A, Arnould C, Constantin P, Desmedt A, Guémené D, Nowak  
579 R, Leterrier C. 2011 Effect of one week of stress on emotional reactivity and learning and  
580 memory performances in Japanese quail. *Behav. Brain Res.* **217**, 104–110.  
581 (doi:10.1016/j.bbr.2010.10.004)
- 582 27. Favreau-Peigné A *et al.* 2016 Unpredictable and repeated negative stimuli increased emotional  
583 reactivity in male quail. *Appl. Anim. Behav. Sci.* **183**, 86–94.  
584 (doi:10.1016/j.applanim.2016.07.010)
- 585 28. Favreau-Peigné A *et al.* 2014 Emotionality modulates the effect of chronic stress on feeding  
586 behaviour in birds. *PLoS One* **9**, 1–12. (doi:10.1371/journal.pone.0087249)
- 587 29. Guibert F, Richard-Yris MA, Lumineau S, Kotrschal K, Bertin A, Petton C, Möstl E, Houdelier  
588 C. 2011 Unpredictable mild stressors on laying females influence the composition of Japanese  
589 quail eggs and offspring's phenotype. *Appl. Anim. Behav. Sci.* **132**, 51–60.  
590 (doi:10.1016/j.applanim.2011.03.012)
- 591 30. Laurence A, Lumineau S, Calandreau L, Arnould C, Leterrier C, Boissy A, Houdelier C. 2014  
592 Short- and long-term effects of unpredictable repeated negative stimuli on Japanese quail's fear  
593 of humans. *PLoS One* **9**, 1–8. (doi:10.1371/journal.pone.0093259)
- 594 31. Ferreira VHB *et al.* 2019 Relationship between ranging behavior and spatial memory of free-  
595 range chickens. *Behav. Processes* **166**, 103888. (doi:10.1016/j.beproc.2019.103888)
- 596 32. Ferreira VHB, Barbarat M, Lormant F, Germain K, Brachet M, Løvlie H, Calandreau L,  
597 Guesdon V. 2020 Social motivation and the use of distal, but not local, featural cues are related  
598 to ranging behavior in free-range chickens (*Gallus gallus domesticus*). *Anim. Cogn.* **23**, 769–  
599 780. (doi:10.1007/s10071-020-01389-w)
- 600 33. Lormant F, Cornilleau F, Constantin P, Meurisse M, Lansade L, Leterrier C, Lévy F,

- 601 Calandreau L. 2018 A trait for a high emotionality favors spatial memory to the detriment of  
602 cue-based memory in Japanese quail. *Behav. Processes* **157**, 256–262.  
603 (doi:10.1016/j.beproc.2018.10.006)
- 604 34. Boulay J, Chaillou E, Bertin A, Constantin P, Arnould C, Leterrier C, Calandreau L. 2013 A  
605 higher inherent trait for fearfulness is associated with increased anxiety-like behaviours and  
606 diazepam sensitivity in Japanese quail. *Behav. Brain Res.* **237**, 124–128.  
607 (doi:10.1016/j.bbr.2012.09.026)
- 608 35. Parois S, Calandreau L, Kraimi N, Gabriel I, Leterrier C. 2017 The influence of a probiotic  
609 supplementation on memory in quail suggests a role of gut microbiota on cognitive abilities in  
610 birds. *Behav. Brain Res.* **331**, 47–53. (doi:10.1016/j.bbr.2017.05.022)
- 611 36. De Quervain D, Schwabe L, Roozendaal B. 2016 Stress, glucocorticoids and memory:  
612 Implications for treating fear-related disorders. *Nat. Rev. Neurosci.* **18**, 7–19.  
613 (doi:10.1038/nrn.2016.155)
- 614 37. Mohapel P, Mundt-Petersen K, Brundin P, Frielingsdorf H. 2006 Working memory training  
615 decreases hippocampal neurogenesis. *Neuroscience* **142**, 609–613.  
616 (doi:10.1016/j.neuroscience.2006.07.033)
- 617 38. Colombo M, Broadbent NJ, Taylor CSR, Frost N. 2001 The role of the avian hippocampus in  
618 orientation in space and time. *Brain Res.* **919**, 292–301. (doi:10.1016/S0006-8993(01)03050-5)
- 619 39. Fremouw T, Jackson-Smith P, Kesner RP. 1997 Impaired place learning and unimpaired cue  
620 learning in hippocampal-lesioned pigeons. *Behav. Neurosci.* **111**, 963–975. (doi:10.1037/0735-  
621 7044.111.5.955)
- 622 40. Hampton RR, Shettleworth SJ. 1996 Hippocampal lesions impair memory for location but not  
623 color in passerine birds. *Behav. Neurosci.* **110**, 831–835. (doi:10.1037/0735-7044.110.4.831)
- 624 41. Kahn MC, Bingman VP. 2009 Avian hippocampal role in space and content memory. *Eur. J.*  
625 *Neurosci.* **30**, 1900–1908. (doi:10.1111/j.1460-9568.2009.06979.x)
- 626 42. Squire LR. 1992 Memory and the hippocampus: A synthesis from findings with rats, monkeys,  
627 and humans. *Psychol. Rev.* **99**, 582–582. (doi:10.1037/0033-295X.99.3.582)
- 628 43. Johnston ST, Shtrahman M, Parylak S, Gonçalves JT, Gage FH. 2016 Paradox of pattern  
629 separation and adult neurogenesis: A dual role for new neurons balancing memory resolution  
630 and robustness. *Neurobiol. Learn. Mem.* **129**, 60–68. (doi:10.1016/j.nlm.2015.10.013)
- 631 44. Neunuebel JP, Knierim JJ. 2014 CA3 retrieves coherent representations from degraded input:  
632 Direct evidence for CA3 pattern completion and dentate gyrus pattern separation. *Neuron* **81**,  
633 416–427. (doi:10.1016/j.neuron.2013.11.017)
- 634
